# Supplementary material for: Optimizing the maximum reported cluster size in the spatial scan statistic for ordinal data
Source: PLoS One. 2017 Jul 28;12(7):e0182234. doi: 10.1371/journal.pone.0182234 (PMC5533428; doi:10.1371/journal.pone.0182234)
Supplement: S1 File — (XLSX) [file pone.0182234.s001.xlsx]

## Sheet: Seoul_centroid
id	x	y
11010	197959	454671
11020	199566	450869
11030	198178	447803
11040	203576	449892
11050	207585	449370
11060	204806	453295
11070	208143	455079
11080	201522	455948
11090	200910	460128
11100	202788	462975
11110	206573	461081
11120	193648	457505
11130	194543	452800
11140	191968	450668
11150	187227	446962
11160	184427	450995
11170	187268	443606
11180	191196	439817
11190	191974	446440
11200	195707	444161
11210	195154	440562
11220	202688	441286
11230	205473	443895
11240	210126	444768
11250	212912	449889

## Sheet: Seoul_birth
id	cases	attribute
11250	2202	1
11250	1551	2
11250	303	3
11240	3363	1
11240	2168	2
11240	426	3
11230	2741	1
11230	1487	2
11230	290	3
11220	2400	1
11220	1399	2
11220	279	3
11210	2435	1
11210	1418	2
11210	262	3
11200	2218	1
11200	1255	2
11200	219	3
11190	2039	1
11190	1203	2
11190	199	3
11180	954	1
11180	657	2
11180	126	3
11170	2479	1
11170	1658	2
11170	313	3
11160	3073	1
11160	1808	2
11160	335	3
11150	1919	1
11150	1327	2
11150	298	3
11140	2046	1
11140	1058	2
11140	210	3
11130	1385	1
11130	783	2
11130	180	3
11120	2321	1
11120	1474	2
11120	358	3
11110	2655	1
11110	1693	2
11110	312	3
11100	1412	1
11100	921	2
11100	194	3
11090	1343	1
11090	924	2
11090	219	3
11080	2100	1
11080	1429	2
11080	298	3
11070	1818	1
11070	1198	2
11070	247	3
11060	1451	1
11060	995	2
11060	203	3
11050	1804	1
11050	968	2
11050	212	3
11040	1738	1
11040	944	2
11040	147	3
11030	1254	1
11030	696	2
11030	171	3
11020	594	1
11020	334	2
11020	85	3
11010	504	1
11010	308	2
11010	58	3
